# Supplementary material for: Surface functionalisation of nanodiamonds for human neural stem cell adhesion and proliferation
Source: PubMed Central journal article supplement (PMC5544760; doi:10.1038/s41598-017-07361-y), 2017-08-04
Supplement: 41598_2017_7361_MOESM1_ESM.pdf [file 41598_2017_7361_MOESM1_ESM.pdf]

# Surface functionalisation of nanodiamonds for human neural stem cell adhesion and proliferation

Alice C. Taylor, Citlali Helenes González, Benjamin Miller, Robert J. Edgington, Patrizia Ferretti, Richard B. Jackman

## Supplementary material

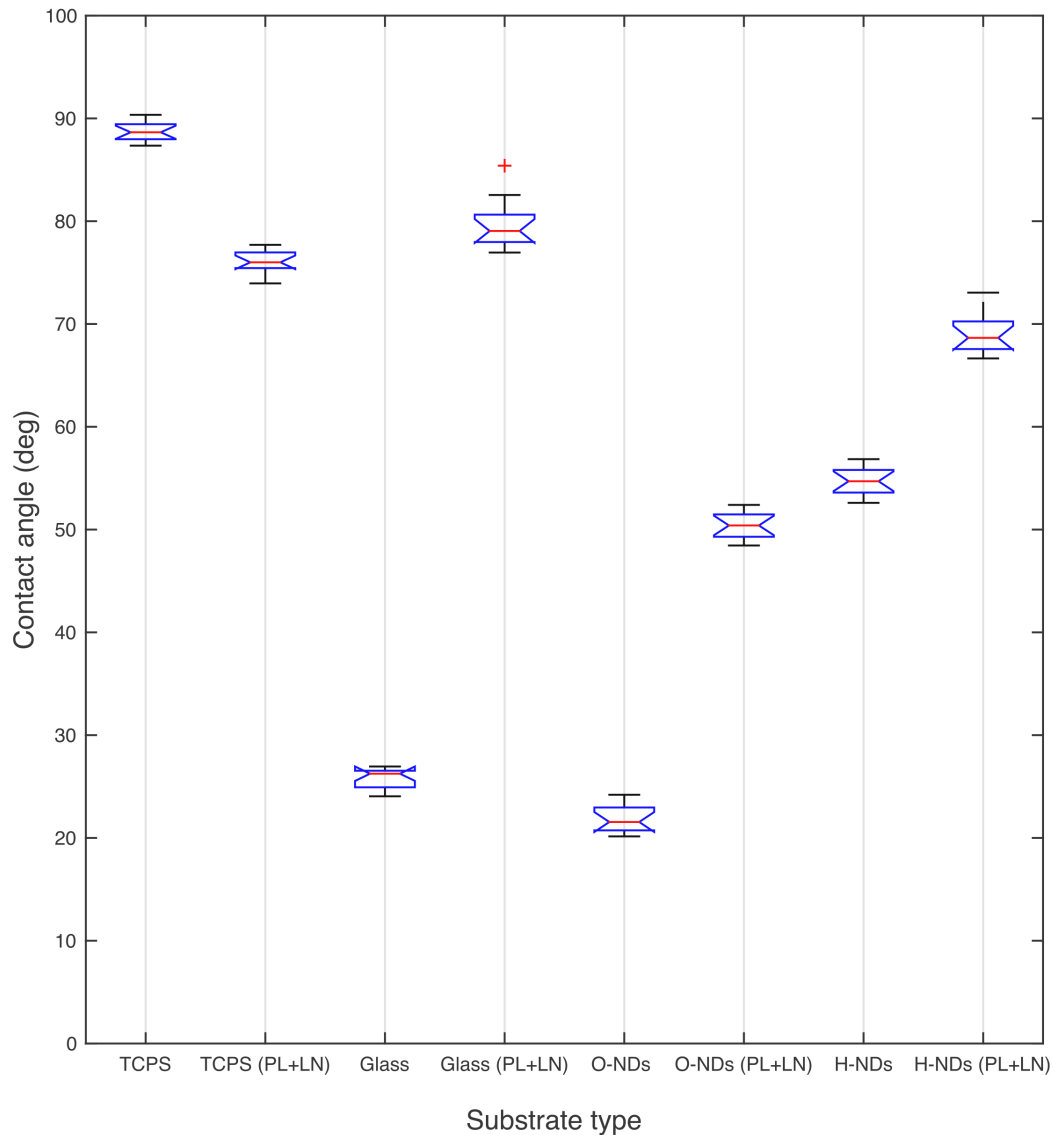

Supplementary Figure 1: ANOVA analysis for contact angle data on Control TCPS, Control Glass, O-NDs and H-NDs with and without polylysine and laminin coating, displayed as a boxplot, for (n=12). Red horizontal lines represent the medians per substrate group in degrees, blue horizontal lines represent upper and lower quartiles, with blue notches signify a 95% confidence interval around the median. Black lines show the range of cell counts. Multicompare analysis shows that all substrates are statistically different with a p-value of  $1.8238 \times 10^{-113}$  has been calculated.
